# Supplementary material for: Islet autoantibodies as precision diagnostic tools to characterize heterogeneity in type 1 diabetes: a systematic review
Source: PubMed Central journal article supplement (PMC10998887; doi:10.1038/s43856-024-00478-y), 2024-04-06
Supplement: 43856_2024_478_MOESM1_ESM.pdf [file 43856_2024_478_MOESM1_ESM.pdf]

## Supplementary Note 1. Search strategy.

2022-06-14

Pubmed

#1

("Precision Medicine"[Mesh] OR Subtype\*[Title/Abstract] OR heterogeneity[Title/Abstract] OR heterogeneity[Title/Abstract] OR endotype\*[Title/Abstract] OR personalized[Title/Abstract] OR tailored[Title/Abstract] OR strat\*[Title/Abstract] OR subgroup\*[Title/Abstract] OR variability[Title/Abstract] OR phenotype\*[Title/Abstract] OR pattern\*[Title/Abstract] OR predict\*[Title/Abstract] OR stage [Title/Abstract] OR variant\*[Title/Abstract] OR predict\*[Title/Abstract] OR risk\*[Title/Abstract] OR genetic risk score\*[Title/Abstract] OR signature\*[Title/Abstract] OR ("genetic predisposition to disease"[MeSH Terms]))  
=8216498

#2

"Diabetes Mellitus, Type 1 "[Mesh]  
=83221

#3

#1 AND #2  
=29779

#4

(review\*[Title/Abstract]) OR (review\*[Publication Type])  
=4132084

#5

#3 NOT #4  
=23830

#6

#7 Filters: Humans, English, from 2011 – 2022  
=9941

**Supplementary Table 1. Non-European populations included in review.**

| <b>Populations from a Non-European Ancestry Studied</b>                     | <b>Number of papers</b> |
|-----------------------------------------------------------------------------|-------------------------|
| Brazilian                                                                   | 2                       |
| Chinese                                                                     | 2                       |
| Japanese                                                                    | 2                       |
| European Caucasians, Moghrabin Caucasians, Black Africans, and Mixed Origin | 1                       |
| Mexican                                                                     | 1                       |
| Tunisian                                                                    | 1                       |
| Qatari                                                                      | 1                       |
